# Supplementary material for: A series of coordination polymers based on varied polycarboxylates and different imidazole-containing ligands: syntheses, crystal structures and physical properties
Source: Royal Society of Chemistry journal article supplement (doi:10.1039/c5ra16112f), 2015-01-01
Supplement: c5ra16112f1.pdf [file c5ra16112f1.pdf]

# A series of coordination polymers based on varied polycarboxylates and different imidazole-containing ligands: Syntheses, crystal structures and physical properties

Xiao-Feng Wang<sup>a</sup>, Min Yu<sup>a</sup>, and Guang-Xiang Liu<sup>a,b,\*</sup>

## Supporting Information

**Table S1** Selected bond lengths (Å) and angles (°) for complexes **1-7<sup>a</sup>**

|                                                                                                          |            |                   |            |
|----------------------------------------------------------------------------------------------------------|------------|-------------------|------------|
| <b>Ni(BDC)(titmb)·3H<sub>2</sub>O (1)</b>                                                                |            |                   |            |
| Ni(1)-O(4)#1                                                                                             | 2.004(3)   | Ni(1)-N(1)#3      | 2.069(4)   |
| Ni(1)-N(3)#2                                                                                             | 2.043(4)   | Ni(1)-O(1)        | 2.189(3)   |
| Ni(1)-N(5)                                                                                               | 2.045(4)   | Ni(1)-O(2)        | 2.200(3)   |
| O(4)#1-Ni(1)-N(3)#2                                                                                      | 106.15(16) | N(5)-Ni(1)-O(1)   | 89.56(15)  |
| O(4)#1-Ni(1)-N(5)                                                                                        | 92.28(16)  | N(1)#3-Ni(1)-O(1) | 89.27(15)  |
| N(3)#2-Ni(1)-N(5)                                                                                        | 91.17(16)  | O(4)#1-Ni(1)-O(2) | 96.44(13)  |
| O(4)#1-Ni(1)-N(1)#3                                                                                      | 88.87(16)  | N(3)#2-Ni(1)-O(2) | 157.39(14) |
| N(3)#2-Ni(1)-N(1)#3                                                                                      | 88.79(15)  | N(5)-Ni(1)-O(2)   | 88.70(14)  |
| N(5)-Ni(1)-N(1)#3                                                                                        | 178.81(18) | N(1)#3-Ni(1)-O(2) | 90.89(15)  |
| O(4)#1-Ni(1)-O(1)                                                                                        | 155.69(13) | O(1)-Ni(1)-O(2)   | 59.35(12)  |
| N(3)#2-Ni(1)-O(1)                                                                                        | 98.04(14)  |                   |            |
| <b>Ni<sub>2</sub>(BDC)<sub>2</sub>(bimb)<sub>2</sub>(H<sub>2</sub>O)<sub>2</sub>·3H<sub>2</sub>O (2)</b> |            |                   |            |
| Ni(1)-O(4)#1                                                                                             | 2.0273(17) | Ni(1)-O(1W)       | 2.086(2)   |
| Ni(1)-N(1)                                                                                               | 2.063(2)   | Ni(1)-O(1)        | 2.1259(19) |
| Ni(1)-N(4)#2                                                                                             | 2.071(2)   | Ni(1)-O(2)        | 2.1369(17) |
| O(4)#1-Ni(1)-N(1)                                                                                        | 90.92(8)   | N(4)#2-Ni(1)-O(1) | 87.88(8)   |

|                                            |            |                     |            |
|--------------------------------------------|------------|---------------------|------------|
| O(4)#1-Ni(1)-N(4)#2                        | 90.14(8)   | O(1W)-Ni(1)-O(1)    | 162.08(7)  |
| N(1)-Ni(1)-N(4)#2                          | 178.79(8)  | O(4)#1-Ni(1)-O(2)   | 161.10(8)  |
| O(4)#1-Ni(1)-O(1W)                         | 97.73(8)   | N(1)-Ni(1)-O(2)     | 91.52(8)   |
| N(1)-Ni(1)-O(1W)                           | 91.88(8)   | N(4)#2-Ni(1)-O(2)   | 87.67(7)   |
| N(4)#2-Ni(1)-O(1W)                         | 87.40(8)   | O(1W)-Ni(1)-O(2)    | 100.92(8)  |
| O(4)#1-Ni(1)-O(1)                          | 99.56(7)   | O(1)-Ni(1)-O(2)     | 61.61(7)   |
| N(1)-Ni(1)-O(1)                            | 92.52(8)   |                     |            |
| <b>NiZn(BTC)(titmb)Br (3)</b>              |            |                     |            |
| Ni(1)-N(1)#2                               | 2.079(4)   | Ni(1)-N(1)#1        | 2.079(4)   |
| Ni(1)-O(1)#1                               | 2.111(3)   | Zn(1)-O(2)#1        | 1.939(3)   |
| Ni(1)-O(1)#2                               | 2.111(3)   | Zn(1)-O(2)          | 1.940(3)   |
| Ni(1)-O(1)                                 | 2.111(3)   | Zn(1)-O(2)#2        | 1.940(3)   |
| Ni(1)-N(1)                                 | 2.079(4)   | Zn(1)-Br(1)         | 2.3595(17) |
| O(2)#1-Zn(1)-O(2)                          | 111.91(10) | N(1)#2-Ni(1)-O(1)#1 | 88.46(14)  |
| O(2)#1-Zn(1)-O(2)#2                        | 111.91(10) | N(1)-Ni(1)-O(1)#2   | 88.46(14)  |
| O(2)-Zn(1)-O(2)#2                          | 111.91(10) | N(1)#1-Ni(1)-O(1)#2 | 86.17(16)  |
| O(2)#1-Zn(1)-Br(1)                         | 106.91(11) | N(1)#2-Ni(1)-O(1)#2 | 177.72(15) |
| O(2)-Zn(1)-Br(1)                           | 106.91(11) | O(1)#1-Ni(1)-O(1)#2 | 91.55(14)  |
| O(2)#2-Zn(1)-Br(1)                         | 106.91(11) | N(1)-Ni(1)-O(1)     | 177.72(15) |
| N(1)-Ni(1)-N(1)#1                          | 93.81(17)  | N(1)#1-Ni(1)-O(1)   | 88.46(14)  |
| N(1)-Ni(1)-N(1)#2                          | 93.81(17)  | N(1)#2-Ni(1)-O(1)   | 86.16(16)  |
| N(1)#1-Ni(1)-N(1)#2                        | 93.81(17)  | O(1)#1-Ni(1)-O(1)   | 91.55(14)  |
| N(1)-Ni(1)-O(1)#1                          | 86.17(16)  | O(1)#2-Ni(1)-O(1)   | 91.55(14)  |
| N(1)#1-Ni(1)-O(1)#1                        | 177.72(15) |                     |            |
| <b>Ni(TBDC)(titmb)(H<sub>2</sub>O) (4)</b> |            |                     |            |
| Ni(1)-O(3)#1                               | 2.040(2)   | Ni(1)-N(1)          | 2.106(3)   |
| Ni(1)-N(6)#2                               | 2.071(3)   | Ni(1)-O(1)          | 2.109(2)   |
| Ni(1)-N(4)#3                               | 2.081(3)   | Ni(1)-O(1W)         | 2.144(3)   |
| O(3)#1-Ni(1)-N(6)#2                        | 99.19(10)  | N(4)#3-Ni(1)-O(1)   | 90.72(10)  |
| O(3)#1-Ni(1)-N(4)#3                        | 91.77(10)  | N(1)-Ni(1)-O(1)     | 91.95(10)  |

|                                                       |            |                    |            |
|-------------------------------------------------------|------------|--------------------|------------|
| N(6)#2-Ni(1)-N(4)#3                                   | 94.07(11)  | O(3)#1-Ni(1)-O(1W) | 86.87(10)  |
| O(3)#1-Ni(1)-N(1)                                     | 85.22(10)  | N(6)#2-Ni(1)-O(1W) | 173.76(11) |
| N(6)#2-Ni(1)-N(1)                                     | 90.03(12)  | N(4)#3-Ni(1)-O(1W) | 87.20(12)  |
| N(4)#3-Ni(1)-N(1)                                     | 175.26(11) | N(1)-Ni(1)-O(1W)   | 88.98(12)  |
| O(3)#1-Ni(1)-O(1)                                     | 174.24(9)  | O(1)-Ni(1)-O(1W)   | 88.07(9)   |
| N(6)#2-Ni(1)-O(1)                                     | 85.81(10)  |                    |            |
| Ni(TBDC)(bix)·H <sub>2</sub> O (5)                    |            |                    |            |
| Ni(1)-O(1)#1                                          | 2.016(2)   | Ni(1)-N(5)         | 2.092(3)   |
| Ni(1)-N(1)                                            | 2.048(3)   | Ni(1)-O(4)         | 2.115(2)   |
| Ni(1)-N(3)                                            | 2.076(3)   | Ni(1)-O(3)         | 2.234(2)   |
| O(1)#1-Ni(1)-N(1)                                     | 109.44(10) | N(3)-Ni(1)-O(4)    | 92.53(10)  |
| O(1)#1-Ni(1)-N(3)                                     | 86.48(10)  | N(5)-Ni(1)-O(4)    | 88.07(10)  |
| N(1)-Ni(1)-N(3)                                       | 92.05(11)  | O(1)#1-Ni(1)-O(3)  | 96.73(9)   |
| O(1)#1-Ni(1)-N(5)                                     | 92.35(10)  | N(1)-Ni(1)-O(3)    | 153.84(10) |
| N(1)-Ni(1)-N(5)                                       | 89.52(10)  | N(3)-Ni(1)-O(3)    | 89.33(10)  |
| N(3)-Ni(1)-N(5)                                       | 178.28(12) | N(5)-Ni(1)-O(3)    | 89.56(9)   |
| O(1)#1-Ni(1)-O(4)                                     | 157.30(9)  | O(4)-Ni(1)-O(3)    | 60.57(8)   |
| N(1)-Ni(1)-O(4)                                       | 93.26(10)  |                    |            |
| Ni(TBDC)(mbix)(H <sub>2</sub> O)·H <sub>2</sub> O (6) |            |                    |            |
| Ni(1)-O(4)#1                                          | 2.0395(18) | Ni(1)-O(1W)        | 2.0778(19) |
| Ni(1)-N(3)                                            | 2.066(2)   | Ni(1)-O(1)         | 2.1374(19) |
| Ni(1)-N(1)#2                                          | 2.068(2)   | Ni(1)-O(2)         | 2.1784(17) |
| O(4)#1-Ni(1)-N(3)                                     | 89.61(8)   | N(1)#2-Ni(1)-O(1)  | 91.12(9)   |
| O(4)#1-Ni(1)-N(1)#2                                   | 88.94(9)   | O(1W)-Ni(1)-O(1)   | 162.08(8)  |
| N(3)-Ni(1)-N(1)#2                                     | 177.86(8)  | O(4)#1-Ni(1)-O(2)  | 162.64(8)  |
| O(4)#1-Ni(1)-O(1W)                                    | 96.36(8)   | N(3)-Ni(1)-O(2)    | 89.48(8)   |
| N(3)-Ni(1)-O(1W)                                      | 93.54(9)   | N(1)#2-Ni(1)-O(2)  | 91.43(8)   |
| N(1)#2-Ni(1)-O(1W)                                    | 88.19(9)   | O(1W)-Ni(1)-O(2)   | 101.00(7)  |
| O(4)#1-Ni(1)-O(1)                                     | 101.52(7)  | O(1)-Ni(1)-O(2)    | 61.12(7)   |
| N(3)-Ni(1)-O(1)                                       | 87.63(9)   |                    |            |

---

Ni(TBDC)(obix)(H<sub>2</sub>O) (7)

|                     |            |                   |            |
|---------------------|------------|-------------------|------------|
| Ni(1)-O(4)#1        | 2.0227(18) | Ni(1)-N(1)        | 2.086(2)   |
| Ni(1)-N(4)#2        | 2.071(2)   | Ni(1)-O(1)        | 2.1548(18) |
| Ni(1)-O(1W)         | 2.072(2)   | Ni(1)-O(2)        | 2.1634(18) |
| O(4)#1-Ni(1)-N(4)#2 | 88.07(8)   | O(1W)-Ni(1)-O(1)  | 160.32(8)  |
| O(4)#1-Ni(1)-O(1W)  | 96.57(8)   | N(1)-Ni(1)-O(1)   | 90.73(8)   |
| N(4)#2-Ni(1)-O(1W)  | 93.61(9)   | O(4)#1-Ni(1)-O(2) | 164.28(7)  |
| O(4)#1-Ni(1)-N(1)   | 89.27(9)   | N(4)#2-Ni(1)-O(2) | 92.27(8)   |
| N(4)#2-Ni(1)-N(1)   | 176.82(9)  | O(1W)-Ni(1)-O(2)  | 99.09(7)   |
| O(1W)-Ni(1)-N(1)    | 88.43(9)   | N(1)-Ni(1)-O(2)   | 89.82(8)   |
| O(4)#1-Ni(1)-O(1)   | 103.08(7)  | O(1)-Ni(1)-O(2)   | 61.24(7)   |
| N(4)#2-Ni(1)-O(1)   | 88.18(8)   |                   |            |

---

<sup>a</sup> Symmetry transformations used to generate equivalent atoms: #1:  $-x+3/2, y-1/2, z-1/2$ ; #2:  $x-1/2, -y-1/2, z$ ; #3:  $x, y-1, z$  for **1**; #1:  $x-1, y, z$ ; #2:  $x+1, y, z+1$  for **2**; #1:  $y, z, x$ ; #2:  $z, x, y$  for **3**; #1:  $-x+1, y-1/2, -z+1/2$ ; #2:  $-x, y+1/2, -z+1/2$ ; #3:  $-x+1, y+1/2, -z+1/2$  for **4**; #1:  $x, y-1, z$  for **5**; #1:  $x, y-1, z$ ; #2:  $x+1, y-1, z$  for **6**; #1:  $x+1, y, z$ ; #2:  $-x+1, -y+1, -z$  for **7**.
